# Supplementary material for: Long Noncoding RNA SBF2-AS1 Is Critical for Tumorigenesis of Early-Stage Lung Adenocarcinoma
Source: PubMed Central journal article supplement (PMC6506611; doi:10.1016/j.omtn.2019.04.004), 2019-04-13

## **Supplemental Information**

### **Long Noncoding RNA SBF2-AS1**

#### **Is Critical for Tumorigenesis**

#### **of Early-Stage Lung Adenocarcinoma**

**Rui Chen, Wenjia Xia, Siwei Wang, Youtao Xu, Zhifei Ma, Weizhang Xu, Erbao Zhang, Jie Wang, Tian Fang, Quan'an Zhang, Gaochao Dong, William Chi-shing Cho, Patrick C. Ma, Giovanni Brandi, Simona Tavolari, Peter Ujhazy, Giulio Metro, Helmut H. Popper, Rong Yin, Mantang Qiu, and Lin Xu**

## **Supplementary Materials**

**Supplementary Table1.** Primers and siRNA sequences

**Supplementary Table2.** Differentially expressed genes after knockdown of SBF2-AS1

**Supplementary Table3.** Function enrichment analyses of differentially expressed genes after knockdown of SBF2-AS1

**Supplementary Table4.** miRNA binding sites within SBF2-AS1 sequence predicted by miRanda algorithm and CLIP-seq

**Supplementary Table5.** Cell cycle-related genes that were downregulated after knockdown of SBF2-AS1

**Supplementary Table6.** Co-expression between 19 cell cycle-related genes and SBF2-AS1 among cancers

## Supplementary File 1. Constructed plasmids vectors used in this study.

The following plasmids were generated by inserting the indicated sequences in the Pezx-FR02 dual- Luciferase reporter vector.

### **E2F1-WT, wild type E2F1 3'UTR**

CAGGGCTTGGAGGGACCAGGGTTTCCAGAGATGCTCACCTTGTCTCTGCA  
GCCCTGGAGCCCCCTGTCCCTGGCCGTCTCCAGCCTGTTTGGAAACATT  
TAATTTATAACCCCTCTCCTCTGTCTCCAGAAGCTTCTAGCTCTGGGGTCTGG  
CTACCGCTAGGAGGCTGAGCAAGCCAGGAAGGGAAGGAGTCTGTGTGGTG  
TGTATGTGCATGCAGCCTACACCCACACGTGTGTACCGGGGGTGAATGTGT  
GTGAGCATGTGTGTGTGCATGTACCGGGGAATGAAGGTGAACATACACCTC  
TGTGTGTGCACTGCAGACACGCCCCAGTGTGTCCACATGTGTGTGCATGAG  
TCCATGTGTGCGCGTGGGGGGGCTCTAACTGCACTTTCGGCCCTTTTGCTC  
TGGGGGTCCCACAAGGCCAGGGCAGTGCCTGCTCCCAGAATCTGGTGCT  
CTGACCAGGCCAGGTGGGGAGGCTTTGGCTGGCTGGGCGTGTAGGACGGT  
GAGAGCACTTCTGTCTTAAAGGTTTTTTCTGATTGAAGCTTTAATGGAGCGT  
TATTTATTTATCGAGGCCTCTTTGGTGAGCCTGGGGAATCAGCAAAGGGGA  
GGAGGGGTGTGGGGTTGATACCCCAACTCCCTCTACCCTTGAGCAAGGGC  
AGGGGTCCCTGAGCTGTTCTTCTGCCCCATACTGAAGGAACTGAGGCCTGG  
GTGATTTATTTATTGGGAAAGTGAGGGAGGGAGACAGACTGACTGACAGC  
CATGGGTGGTCAGATGGTGGGGTGGGCCCTCTCCAGGGGGCCAGTTCAGG  
GCCCCAGCTGCCCCCAGGATGGATATGAGATGGGAGAGGTGAGTGGGGG  
ACCTTCACTGATGTGGGCAGGAGGGGTGGTGAAGGCCTCCCCAGCCCAG  
ACCCTGTGGTCCCTCCTGCAGTGTCTGAAGCGCCTGCCTCCCCACTGCTCT  
GCCCCACCCTCCAATCTGCACTTTGATTTGCTTCCTAACAGCTCTGTTCCCT  
CCTGCTTTGGTTTTAATAAATATTTTGATGACGTT

### **E2F1-MUT1, binding site of miR-338-3p was deletion-mutated**

CAGGGCTTGGAGGGACCAGGGTTTCCAGAGATGCTCACCTTGTCTCTGCA  
GCCCTGGAGCCCCCTGTCCCTGGCCGTCTCCAGCCTGTTTGGAAACATT  
TAATTTATAACCCCTCTCCTCTGTCTCCAGAAGCTTCTAGCTCTGGGGTCTGG  
CTACCGCTAGGAGGCTGAGCAAGCCAGGAAGGGAAGGAGTCTGTGTGGTG  
TGTATGTGCATGCAGCCTACACCCACACGTGTGTACCGGGGGTGAATGTGT  
GTGAGCATGTGTGTGTGCATGTACCGGGGAATGAAGGTGAACATACACCTC  
TGTGTGTGCACTGCAGACACGCCCCAGTGTGTCCACATGTGTGTGCATGAG  
TCCATGTGTGCGCGTGGGGGGGCTCTAACTGCACTTTCGGCCCTTTTGCTC  
TGGGGGTCCCACAAGGCCAGGGCAGTGCCTGCTCCCAGAATCTGGTGCT  
CTGACCAGGCCAGGTGGGGAGGCTTTGGCTGGCTGGGCGTGTAGGACGGT  
GAGAGCACTTCTGTCTTAAAGGTTTTTTCTGATTGAAGCTTTAATGGAGCGT  
TATTTATTTATCGAGGCCTCTTTGGTGAGCCTGGGGAATCAGCAAAGGGGA  
GGAGGGGTGTGGGGTTGATACCCCAACTCCCTCTACCCTTGAGCAAGGGC

AGGGGTCCCTGAGCTGTTCTTCTGCCCCATACTGAGGCCTGGGTGATTT  
ATTTATTGGGAAAGTGAGGGAGGGAGACAGACTGACTGACAGCCATGGGT  
GGTCAGATGGTGGGGTGGGCCCTCTCCAGGGGGCCAGTTCAGGGCCCCAG  
CTGCCCCCAGGATGGATATGAGATGGGAGAGGTGAGTGGGGGACCTTCA  
CTGATGTGGGCAGGAGGGGTGGTGAAGGCCTCCCCAGCCCAGACCCTGT  
GGTCCCTCCTGCAGTGTCTGAAGCGCCTGCCTCCCCACTGCTCTGCCCCAC  
CCTCCAATCTGCACTTTGATTTGCTTCCTAACAGCTCTGTTCCCTCCTGCTT  
TGGTTTTAATAAATATTTTGATGACGTT

**E2F1-MUT2, binding sites of miR-362-3p were deletion-mutated**

CAGGGCTTGAGAGGACCAGGGTTTCCAGAGATGCTCACCTTGTCTCTGCA  
GCCCTGGAGCCCCCTGTCCCTGGCCGTCTCCAGCCTGTTTGGAAACATT  
TAATTTATAACCCTCTCCTCTGTCTCCAGAAGCTTCTAGCTCTGGGGTCTGG  
CTACCGCTAGGAGGCTGAGCAAGCCAGGAAGGGAAGGAGTCTGTGTGTGT  
GCATGCAGCCTACACCCACACCCGGGGGTGAATGTGTGTGAGCATGTGTGT  
GTGCATGTACCGGGGAATGAAGGTGAACATACACCTCTGTGTGTGCACTGC  
AGACACGCCCCAGTGTGTCCACATGTGTGTGCATGAGTCCATGTGTGCGCG  
TGGGGGGGCTCTAACTGCACTTTCGGCCCTTTTGCTCTGGGGGTCCCACAA  
GGCCCAGGGCAGTGCCTGCTCCCAGAATCTGGTGCTCTGACCAGGCCAGG  
TGGGGAGGCTTTGGCTGGCTGGGCGTGTAGGACGGTGAGAGCACTTCTGT  
CTAAAGGTTTTTCTGATTGAAGCTTTAATGGAGCGTTATTTATTTATCGAG  
GCCTCTTTGGTGAGCCTGGGGAATCAGCAAAGGGGAGGAGGGGTGTGGG  
GTTGATACCCCAACTCCCTCTACCCTTGAGCAAGGGCAGGGGTCCCTGAGC  
TGTTCTTCTGCCCCATACTGAAGGAACTGAGGCCTGGGTGATTTATTTATTG  
GGAAAGTGAGGGAGGGAGACAGACTGACTGACAGCCATGGGTGGTCAGA  
TGGTGGGGTGGGCCCTCTCCAGGGGGCCAGTTCAGGGCCCCAGCTGCCCC  
CCAGGATGGATATGAGATGGGAGAGGTGAGTGGGGGACCTTCACTGATGT  
GGGCAGGAGGGGTGGTGAAGGCCTCCCCAGCCCAGACCCTGTGGTCCCT  
CCTGCAGTGTCTGAAGCGCCTGCCTCCCCACTGCTCTGCCCCACCCTCCAA  
TCTGCACTTTGATTTGCTTCCTAACAGCTCTGTTCCCTCCTGCTTTGGTTTTA  
ATAAATATTTTGATGACGTT

The following plasmids were generated by inserting the indicated sequences between the BamHI site and XhoI sites of pcDNA3.1(+) (Life Technologies).

SBF2-AS1 WT, wild SBF2-AS1 full length sequence

CAGGTTCCAGCCCCGACCCGGGCGCGCGGGGCCGACTAGGGTCCGGGTCCA  
GTGTGCGGTGGTCGCTCCGCTCCGGGCCGCTCCGCTCTGGGCGTCAGGGC  
GCGGGGAGCTGCCCCGGGGTTCTGTCCACCGGGGAGGAAAGCCACGAGC  
ACTGAGCGCCTCCTGAGAGCCAGCCCTGACGTGAACTCATTTTATCTGCCA



CGACCCAGAAGGAGTCTACTGCTAAGATTTTCAGCATGTCCTGTGGCTGAG  
TTAATCAGAGTTATGACAGGAAGGTACCGGGCACACCATCGCAATGCTCC  
ATCAATGCTAGTATGTTGTGTTCTTTCCTTCATATCAAGTCAACTCAAGCT  
TGCTCTACTTACCTGGTGTACACAGTCTAAGAAGTGTAAAGAAGACTGGAG  
CAAACCACTCCCCTGACAGTTGAGGGTCAAGCTGCTCCTCTGACTGAAT  
TTGTGACCAAAGAGAGCCACTCTTTTTCAACCAACATCTGGAAGCCTTC  
AAGTGTCTATAAAAAGGGATCACTGAGTAACTGAACCAGGGATGTCACCT  
AGGGCATAAGCAGGATGGATTGTCATTAATTTTAGTTCTGAAAAAGGCCT  
ATTACTAAGATAAAAAGCACTTCCTTCTGATGATAGCTAATTCACAAATTTA  
CCTGGACAGCAAATTTGTTCACTAACCATTCCAGGATGGCCAATAAAAATT  
AATTTTGTAAGTGTGCCAGTAAAAACTAAAGCTCAAATTCATTTTGGCTAC  
AAGTTTACTTTCAGGGAATTGAGACTTTAATCCTTAACTGGCCAGTTTGCT  
GACAGCAACCTTTTCCTAAGTTAATCAGAGGCCAGAGGATCAGTTAAAT  
CAATTCCTACTTTTTGGCAGATGCAGATTAATGTCTTAATGTAGTCTGAACT  
CACACTTTTCACTCTGGAGTGAGTTAAGGCGGGGCTTATAGAGAGCCAGG  
GGATGGACTGACAAAACCCAGGAAGGATGGTCCACGCCTCACACTGCTGG  
TCAAGGGCTCCATCCGCAAGCCTGCATGGTACATCTGTGGATGGGAGAGC  
TTGATGCCCGGAGCCAGAGCTCCAGGCTGCGTAGGGGCTAAGAGCTCATG  
GTACGGAGTTTTCTGATGGATAACCAGGTGCTGTTTAAACACAGGACTTTC  
TGTCATAAACACATTAGTCATTATACAAAAGAGTCATCTGAAGAATTTA  
AAAATGACCAAATGGAAATATAAATATAAAAATATCAAAAAATATGTCTAA  
TAGTTTACTTGTGCAGTGATGTCCCAGCCTTCCTCCAACAGACCAAACCT  
GAGGAACCATTCCTCAAGTACTTCTGATACAACCACAGCCAGCTGCATTAT  
CCTGTGAAGCTAAGAGACAGGAAGGAGAACAATTAGACCAAGCGCTT  
TCTGAGTGCAGAAGTCAGAGAGAGTTGCTTTCACCCTGGATAATCAAAC  
GACTTAGGGATAAAGCGCTTGCACAAAAGAACCACATAATGTTTTAAATA  
CCTAAAGTTCTTTCAAATCAAGATTAACAATGACACTTTTGACTGGATGC  
AATGACTCATGCCATAATCCCAGCACTTTGGGAGGCCGAGCCGGGCAGG  
TCATTTGAGGTTTCGGAGTTCGAGACCAGCCTGGGCAACATAAGCAAGACC  
CTGTCTCGAAAAATAAAAATAAAAAGATACTCCTATTTGTCTATACTGT  
GTACTAAATGAGAAAAAACTTTCAATATATTTGTGCTAAGTTTTTAAAGC  
CACATCAATTGGCTCAAAGTCCTTAATAACAATTAAGGTATGAGAATAG  
TATATAGATTTTAAAACAGATGTATAACATTGTAATTTTAAAAAATATTT  
TAATGATCATCAGACATAATTTGCAATTTGAATCCAACCTCTGAACAAGAA  
CAAAAATGAAAAAACCCATCTCTTAAACAGAGCTAGGCTACTTTAAACAC  
AGGAATAAGGCAAATGCCCTACTCAGTAATGAGAAGCTCCTCATGTAAC  
GTTTCTACAACATAGCTATCACCAGGCCTGAATTCTTTTGGGCTCAGAATT  
TGTTCTAAGAAATGGCTATTATTA AAAAGTCAAAAAATAACAGATGCTGG  
CGAGCCTGTGGAGAAAAGGGAATGTATATACATTTCTGGTGGGAATGTAA  
ATTAGTTCAGCCATTGTAGAAAGTAGTTTGGTGATTTCTCAAATAACTTAA  
AACAGAATTACCATTTGACCTAGCAATCCCATTACTGAGTATATACCCAA  
AGGAATATAAATTGTTCTACCATAAAGTCACATGCACACACATGTTTCAGT  
GCTGTACTATTCACAATAGCAAAGACATGGAGTCAACCTATATGCCCATC  
AACGGTAGACTGGATAAAGAAAATATGGTACATATACACCATGGAATACT

ACACAGCCATAAAAAGAATGAGCTTATGTCCTTTGCAGTAACACAGCTGA  
AGCAAATAACACAGGAATGGAAAACCAATACTGCATATTCTCACTTAT  
AAGTGGGAGCTAACATTGAGTACACATGGACACAAAGAAAGGAATAGA  
CGCCTGGGGCGTATTTGAGGTTGGAGGTGAGAGGAGGGTGAGGATAGAA  
AACTACCTATCAGGTAATGCTTATTACCTGGGTGATGAAATAATCTGT  
ACACCAAATAACCAAGATATGCAATGTACCTATAACAACAACCTACAT

**SBF2-AS1-MUT1, binding sites of miR-338-3p were deletion-mutated**

CAGGTTCCAGCCCCGACCCGGGCGCGCGGGGCCGACTAGGGTCCGGGTCCA  
GTGTGCGGTGGTCGCTCCGCTCCGGGCGCTCCGCTCTGGGCGTCAGGGC  
GCGGGGAGCTGCCCCGGGGTTCTGTCCACCGGGGAGGAAAGCCACGAGC  
ACTGAGCGCCTCCTGAGAGCCAGCCCTGACGTGAATCATTTTATCTGCCA  
CGACCCAGAAGGAGTCTACTGCTAAGATTTTACGCATGTCCTGTGGCTGAG  
TTAATCAGAGTTATGACAGGAAGGTACCGGGCACACCATCGCAATGCTCC  
ATCAATGCTAGTATGTTGTGTTCTTTCCCTTCATATCAAGTCAACTCAAGCT  
TGCTCTACTTACCTGGTGTACACAGTCTAAGAAGTGTAAAGAACTGGAG  
CAAAACCACTCCCCTGACAGTTGAGGGTCAAGCTGCTCCTCTGACTGAAT  
TTGTGACCAAAGAGAGCCACTCTTTTTCAACCAACATCTGGAAGCCTTC  
AAGTGTCTATAAAAAGGGATCACTGAGTAACTGAACCAGGGATGTCACCT  
AGGGCATAAGCAGGATGGATTGTCATTAATTTTAGTTCTGAAAAAGGCCT  
ATTACTAAGATAAAAAGCACTTCCTTCTGATGATAGCTAATTCACAAATTA  
CCTGGACAGCAAATTTGTTCACTAACCATTCCAGGATGGCCAATAAAAATT  
AATTTTGTAACCTTGCCAGTAAAAACTAAAGCTCAAATTCATTTTGGCTAC  
AAGTTTACTTTCAGGGAATTGAGACTTTAATCCTTAACTGGCCAGTTTGCT  
GACAGCAACCTTTTCCCTAAGTTAATCAGAGGCCAGAGGATCAGTTAAAT  
CAATTCTACTTTTTGGCAGATGCAGATTAATGTCTTAATGTAGTCTGAACT  
CACACTTTTCACTCTGGAGTGAGTTAAGGCGGGGCTTATAGAGAGCCAGG  
GGATGGACTGACAAAACCCAGGAAGGATGGTCCACGCCTCACACTCAAG  
GGCTCCATCCGCAAGCCTGCATGGTACATCTGTGGATGGGAGAGCTTGAT  
GCCCCGAGCCAGAGCTCCAGGCTGCGTAGGGGCTAAGAGCTCATGGTACG  
GAGTTTTCTGATGGATAACCAGGTGCTGTTTAAACACAGGACTTTCTCTGTCC  
ATAAACACATTAGTCATTATACAAAAGAGTCATCTGAAGAATTTAAAAAT  
GACCAAATGGAAATATAAATATAAATATCAAAAAATATGTCTAATAGTT  
TACTTGTGCAGTGATGTCCCAGCCTTCCTCCAAACAGACCAAATACTGAGG  
AACCATTCTCAAGTACTTCTGATACAACCACAGCCAGCTGCATTATCCTGT  
GAAGCTAAGAGACAGGAAGGAGAACACAATTAGACCAAGCGCTTTCTGA  
GTGCAGAAGTCAGAGAGAGTTGCTTTCAACCCTGGATAATCAAACGACTT  
AGGGATAAAGCGCTTGCACAAAAGAACCACATAATGTTTTAAATACCTAA  
AGTTCTTTCAAATCAAGATTAACAATGACACTTTTGACTGGATGCAATG  
ACTCATGCCATAATCCAGCACTTTGGGAGGCCGAGCCGGGCAGGTCAT  
TTGAGGTTTCGGAGTTTCGAGACCAGCCTGGGCAACATAAGCAAGACCCTGT  
CTCGAAAAATAAAAAATAAAAAAGATACTCCTATTTGTCTATACTGTGTAC  
TAAATGAGAAAAAACTTTCAATATATTTGTGCTAAGTTTTTAAAGCCAC

ATCAATTGGCTCAAAGTCCTTAATAACAATTAAGGTATGAGAATAGTAT  
ATAGATTTTAAAACCAGATGTATAACATTGTAATTTTAAAAAATATTTTAA  
TGATCATCAGACATAATTTGCAATTTGAATCCAACCTCTGAACAAGAACAA  
AAATGAAAAAACCCATCTCTTAAACAGAGCTAGGCTACTTTAAACACAGG  
AATAAGGCAAATGCCCTACTCAGTAATGAGAAGCTCCTCATGTAAGTGT  
TCTACAACATAGCTATCACCAGGCCTGAATTCTTTGGGCTCAGAATTTGT  
TCTAAGAAATGGCTATTATTAATAAAGTCAAAAAATAACACGAGCCTGTGG  
AGAAAAGGGAATGTATATACATTTCTGGTGGGAATGTAAATTAGTTCAGC  
CATTGTAGAAAGTAGTTTGGTGATTTCTCAAATAACTTAAAACAGAATTA  
CCATTTGACCTAGCAATCCCATTACTGAGTATATACCCAAAGGAATATAA  
ATTGTTCTACCATAAAGTCACATGCACACACATGTTTCAGTGCTGTACTATT  
CACAATAGCAAAGACATGGAGTCAACCTATATGCCCATCAACGGTAGACT  
GGATAAAGAAAATATGGTACATATACACCATGGAATACTACACAGCCATA  
AAAAGAATGAGCTTATGTCCTTTGCAGTAACACAGCTGAAGCAAATAAC  
ACAGGAATGGAAAACCAAATACTGCATATTCTCACTTATAAGTGGGAGCT  
AAACATTGAGTACACATGGACACAAAGAAAGGAATAGACGCCTGGGGCG  
TATTTGAGGTTGGAGGTGAGAGGAGGGTGAGGATAGAAAACTACCTATC  
AGGTAATGCTTATTACCTGGGTGATGAAATAATCTGTACACCAAACCTCC  
CAAGATATGCAATGTACCTATACAACAAACCTACAT

**SBF2-AS1-MUT2, binding site of miR-362-3p was deletion-mutated**

CAGGTTCCAGCCCCGACCCGGGCGCGCGGGGCCGACTAGGGGTCGGGTCCA  
GTGTGCGGTGGTCGCTCCGCTCCGGGCGCTCCGCTCTGGGCGTCAGGGC  
GCGGGGAGCTGCCCCGGGGTTCTGTCCACCGGGGAGGAAAGCCACGAGC  
ACTGAGCGCCTCCTGAGAGCCAGCCCTGACGTGAACTCATTTTATCTGCCA  
CGACCCAGAAGGAGTCTACTGCTAAGATTTTCAGCATGTCCTGTGGCTGAG  
TTAATCAGAGTTATGACAGGAAGGTACCGGGCACACCATCGCAATGCTCC  
ATCAATGCTAGTATGTTGTGTTCTTTCCTTCATATCAAGTCAACTCAAGCT  
TGCTCTACTTACCTGGTGTACACAGTCTAAGAAGTGTAAAGAAGACTGGAG  
CAAACCCTCCCTGACAGTTGAGGGTCAAGCTGCTCCTCTGACTGAAT  
TTGTGACCAAAGAGAGCCACTCTTTTCAACCAACATCTGGAAGCCTTC  
AAGTGTCTATAAAAAGGGATCACTGAGTAACTGAACCAGGGATGTCACCT  
AGGGCATAAGCAGGATGGATTGTCATTAATTTTAGTTCTGAAAAAGGCCT  
ATTACTAAGATAAAAAGCACTTCCTTCTGATGATAGCTAATTCACAAATTA  
CCTGGACAGCAAATTTGTTCACTAACCATTCCAGGATGGCCAATAAAATT  
AATTTTGTAACCTTGCCAGTAAAACTAAAGCTCAAATTCATTTTGGCTAC  
AAGTTTACTTTCAGGGAATTGAGACTTTAATCCTTAACTGGCCAGTTTGCT  
GACAGCAACCTTTTCCTAAGTTAATCAGAGGCCAGAGGATCAGTTAAAT  
CAATCTACTTTTGGCAGATGCAGATTAATGTCTTAATGTAGTCTGAACT  
CACACTTTTCACTCTGGAGTGAGTTAAGGCGGGGCTTATAGAGAGCCAGG  
GGATGGACTGACAAAACCCAGGAAGGATGGTCCACGCCTCACACTGCTGG  
TCAAGGGCTCCATCCGCAAGCCTGCATGGTACATCTGTGGATGGGAGAGC  
TTGATGCCCGGAGCCAGAGCTCCAGGCTGCGTAGGGGCTAAGAGCTCATG

GTACGGAGTTTTCTGATGGATAACCAGGTGCTGTTTAAACACAGGACTTTCTC  
TGTCCATAAACACATTAGTCATTATACAAAAGAGTCATCTGAAGAATTTA  
AAAATGACCAAATGGAAATATAAATATAAAATATCAAAAAATATGTCTAA  
TAGTTTACTTGTGCAGTGATGTCCCAGCCTTCCTCCAAACAGACCAAACACT  
GAGGAACCATTCTCAAGTACTTCTGATACAACCACAGCCAGCTGCATTAT  
CCTGTGAAGCTAAGAGACAGGAAGGAGAACAATTAGACCAAGCGCTT  
TCTGAGTGCAGAAGTCAGAGAGAGTTGCTTTCAACCCTGGATAATCAAAC  
GACTTAGGGATAAAGCGCTTGCACAAAAGAACCACATAATGTTTTAAATA  
CCTAAAGTTCTTTCAAATCAAGATTAACAATGACACTTTTGACTGGATGC  
AATGACTCATGCCATAATCCCAGCACTTTGGGAGGCCGAGCCGGGCAGG  
TCATTTGAGGTTTCGGAGTTCGAGACCAGCCTGGGCAACATAAGCAAGACC  
CTGTCTCGAAAAATAAAAAATAAAAAAGATACTCCTATTTGTCTATACCTA  
AATGAGAAAAAACTTTCAATATATTTGTGCTAAGTTTTTAAAGCCACATC  
AATTGGCTCAAAGTCCTTAATAACAATTAAGGTATGAGAATAGTATATA  
GATTTTAAAACCAGATGTATAACATTGTAATTTTAAAAAATATTTTAATGA  
TCATCAGACATAATTTGCAATTTGAATCCAACCTCTGAACAAGAACAAAA  
TGAAAAAACCCATCTCTTAAACAGAGCTAGGCTACTTTAAACACAGGAAT  
AAGGCAAATGCCCTACTCAGTAATGAGAAGCTCCTCATGTAACGTGTTTCT  
ACAACATAGCTATCACCAGGCCTGAATTCTTTTGGGCTCAGAATTTGTTCT  
AAGAAATGGCTATTATTA AAAAGTCAAAAAATAACAGATGCTGGCGAGC  
CTGTGGAGAAAAGGGAATGTATATACATTTCTGGTGGGAATGTAAATTAG  
TTCAGCCATTGTAGAAAGTAGTTTGGTGATTTCTCAAATAACTTAAAACAG  
AATTACCATTTGACCTAGCAATCCCATTACTGAGTATATACCCAAAGGAA  
TATAAATTGTTCTACCATAAAGTCACATGCACACACATGTTTCAGTGCTGTA  
CTATTCACAATAGCAAAGACATGGAGTCAACCTATATGCCCATCAACGGT  
AGACTGGATAAAGAAAATATGGTACATATACCCATGGAATACTACACAG  
CCATAAAAAGAATGAGCTTATGTCCTTTGCAGTAACACAGCTGAAGCAA  
CTAACACAGGAATGGAAAACCAATACTGCATATTCTCACTTATAAGTGG  
GAGCTAAACATTGAGTACACATGGACACAAAGAAAGGAATAGACGCCTG  
GGGCGTATTTGAGGTTGGAGGTGAGAGGAGGGTGAGGATAGAAAACTA  
CCTATCAGGTAATGCTTATTACCTGGGTGATGAAATAATCTGTACACCA  
AACTCCCAAGATATGCAATGTACCTATACAACAAACCTACAT

**SBF2-AS1-MUT, binding sites of miR-338-3p and miR-362-3p were deletion-mutated**

CAGGTTCCAGCCCCGACCCGGGCGCGCGGGGCCGACTAGGGTTCGGGTCCA  
GTGTGCGGTGGTCGCTCCGCTCCGGGCCGCTCCGCTCTGGGCGTCAGGGC  
GCGGGGAGCTGCCCCGGGGTTCTGTCCACCGGGGAGGAAAGCCACGAGC  
ACTGAGCGCCTCCTGAGAGCCAGCCCTGACGTGAACTCATTTTATCTGCCA  
CGACCCAGAAGGAGTCTACTGCTAAGATTTAGCATGTCCTGTGGCTGAGT

TAATCAGAGTTATGACAGGAAGGTACCGGGCACACCATCGCAATGCTCCAT  
CAATGCTAGTATGTTGTGTTCTTTTCCTTCATATCAAGTCAACTCAAGCTTGC  
TCTACTTACCTGGTGTACACAGTCTAAGAACTGTAAGAAGACTGGAGCAA  
ACCACTCCCCTGACAGTTGAGGGTCAAGCTGCTCCTCTGACTGAATTTGTG  
ACCAAAGAGAGCCACTCTTTTTCAACCAACATCTGGAAGCCTTCAAGTG  
TCCTATAAAAGGGATCACTGAGTAACTGAACCAGGGATGTCACCTAGGGCA  
TAAGCAGGATGGATTGTCATTAATTTTAGTTCTGAAAAAGGCCTATTACTAA  
GATAAAAGCACTTCCTTCTGATGATAGCTAATTCACAAATTTACCTGGACAG  
CAAATTTGTTCACTAACCATCCAGGATGGCCAATAAAATTAATTTTGTA  
CTTGCCAGTAAAAACTAAAGCTCAAATTCATTTTGGCTACAAGTTTACTTTC  
AGGGAATTGAGACTTTAATCCTTAACTGGCCAGTTTGCTGACAGCAACCTT  
TTCCTAAGTTAATCAGAGGCCAGAGGATCAGTTAAAATCAATTCTACTTTTT  
GGCAGATGCAGATTAATGTCTTAATGTAGTCTGAACTCACACTTTTCACTCT  
GGAGTGAGTTAAGGCGGGGCTTATAGAGAGCCAGGGGATGGACTGACAAA  
ACCCAGGAAGGATGGTCCACGCCTCACACTCAAGGGCTCCATCCGCAAGC  
CTGCATGGTACATCTGTGGATGGGAGAGCTTGATGCCCGGAGCCAGAGCTC  
CAGGCTGCGTAGGGGCTAAGAGCTCATGGTACGGAGTTTTCTGATGGATAC  
CAGGTGCTGTTTAAACACAGGACTTTCTCTGTCCATAAACACATTAGTCATTA  
TACAAAAGAGTCATCTGAAGAATTTAAAAATGACCAAATGGAAATATAAAT  
ATAAAATATCAAAAATATGTCTAATAGTTTACTTGTGCAGTGATGTCCAG  
CCTTCCTCCAAACAGACCAAACTGAGGAACCATTCTCAAGTACTTCTGAT  
ACAACCACAGCCAGCTGCATTATCCTGTGAAGCTAAGAGACAGGAAGGAG  
AACACAATTAGACCAAGCGCTTTCTGAGTGCAGAAGTCAGAGAGAGTTGC  
TTTCAACCCTGGATAATCAAACGACTTAGGGATAAAGCGCTTGCACAAAAG  
AACCACATAATGTTTTAAATACCTAAAGTTCTTTCAAATCAAGATTAACAA  
TGACACTTTTACTGGATGCAATGACTCATGCCATAATCCCAGCACTTTGG  
GAGGCCGAGCCGGGCAGGTCATTTGAGGTTTCGGAGTTCGAGACCAGCCTG  
GGCAACATAAGCAAGACCCTGTCTCGAAAAATAAAAAATAAAAAAGATACT  
CCTATTTGTCTATACCTAAATGAGAAAAAACTTTCAATATATTTGTGCTAAG  
TTTTTAAAGCCACATCAATTGGCTCAAAGTCCTTAATAACAATTAAGGTAT  
GAGAATAGTATATAGATTTTAAAACAGATGTATAACATTGTAATTTTAAAA  
ATATTTAATGATCATCAGACATAATTTGCAATTTGAATCCAACCTCTGAACAA  
GAACAAAATGAAAAAACCCATCTCTTAAACAGAGCTAGGCTACTTTAAAC  
ACAGGAATAAGGCAAATGCCCTACTCAGTAATGAGAAGCTCCTCATGTAAC  
TGTTTCTACAACATAGCTATCACCAGGCCTGAATTCCTTTTGGGCTCAGAATT  
TGTTCTAAGAAATGGCTATTATTAATAAAGTCAAAAAATAACACGAGCCTGT  
GGAGAAAAGGGAATGTATATACATTTCTGGTGGGAATGTAAATTAGTTCAG  
CCATTGTAGAAAGTAGTTTGGTGATTTCTCAAATAACTTAAAACAGAATTAC  
CATTTGACCTAGCAATCCCATTACTGAGTATATACCCAAAGGAATATAAATTG  
TTCTACCATAAAGTCACATGCACACACATGTTTCAGTGCTGTACTATTCACAA  
TAGCAAAGACATGGAGTCAACCTATATGCCCATCAACGGTAGACTGGATAA  
AGAAAATATGGTACATATACACCATGGAATACTACACAGCCATAAAAAGAAT  
GAGCTTATGTCCTTTGCAGTAAACAGCTGAAGCAAATAACACAGGAATG  
GAAAACCAAATACTGCATATTCTCACTTATAAGTGGGAGCTAAACATTGAGT

ACACATGGACACAAAGAAAGGAATAGACGCCTGGGGCGTATTTGAGGTTG  
GAGGTGAGAGGAGGGTGAGGATAGAAAACTACCTATCAGGTACTATGCTT  
ATTACCTGGGTGATGAAATAATCTGTACACCAAACCTCCAAGATATGCAATG  
TACCTATAACAACCTACAT

**Figure S1:** Screening early stage-specific lncRNAs. 5 outliers were excluded from hierarchical clustering of cancer tissue samples (A). 12 significant co-expression gene modules across all 508 sampling sets were detected with WGCNAs (B). Soft thresholding power to achieve scale-free topology ( $\beta = 2$ ) (C). The correlation within gene sets of module greenyellow (D). The heatmap of all 3250 differentially expressed genes in GSE19804 (E).

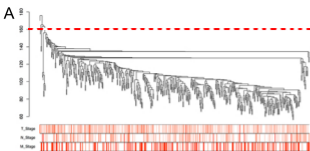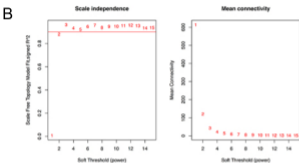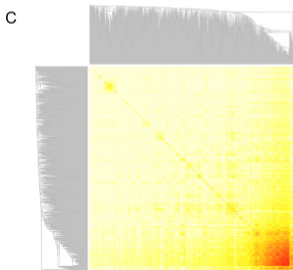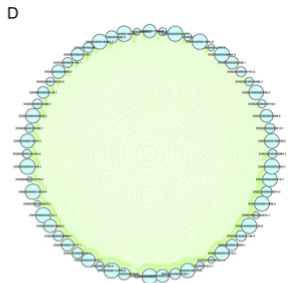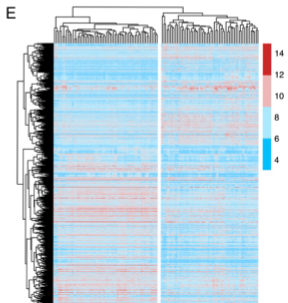



**Figure S2.** SBF2-AS1 promotes H1299 cell proliferation. Cell cycle was arrested at G1 phase in H1299 cells upon SBF2-AS1 knockdown (A). Expression of Cyclin D1 and P21 after ectopic expression and silence of SBF2-AS1 in H1299 cells (B). CCK8 assay (C), EdU (D), and colony formation assay (E) in H1299 cells after ectopic and silence of SBF2-AS1

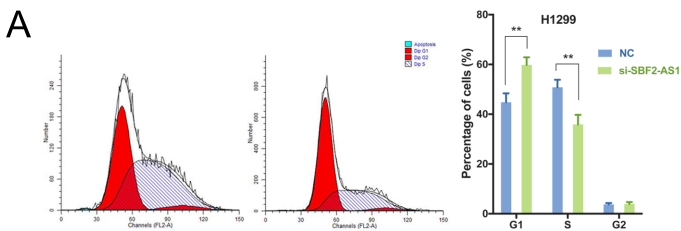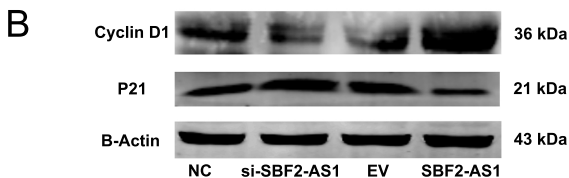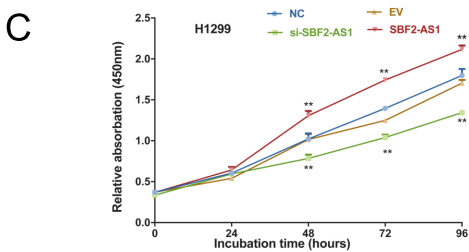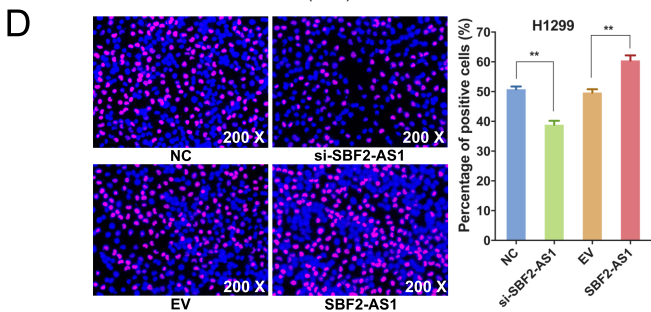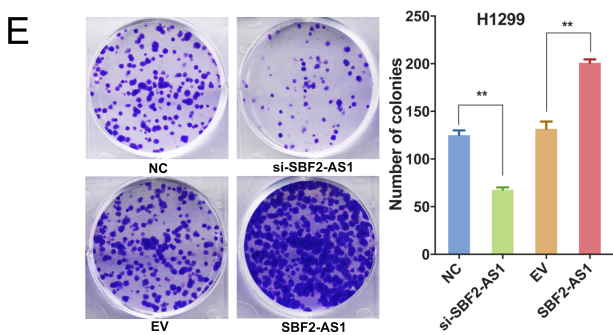

**Figure S3.** Colony formation (A) and EdU (B) assay in H1299 cells. CCK8 assay in A549 (C) and H1299 (D) cells.

**A**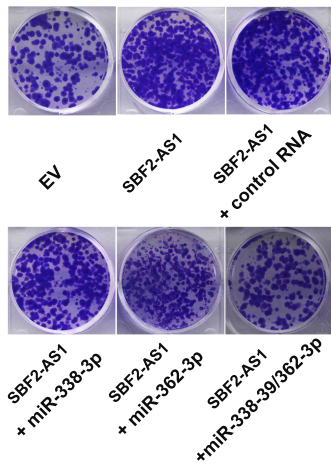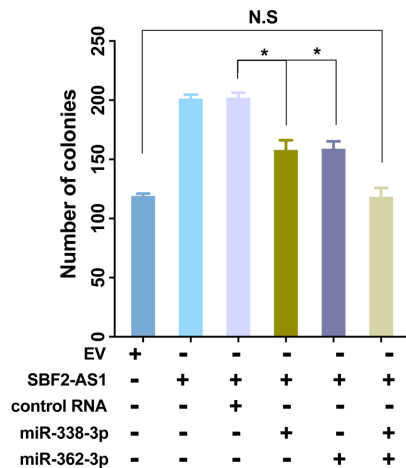**C**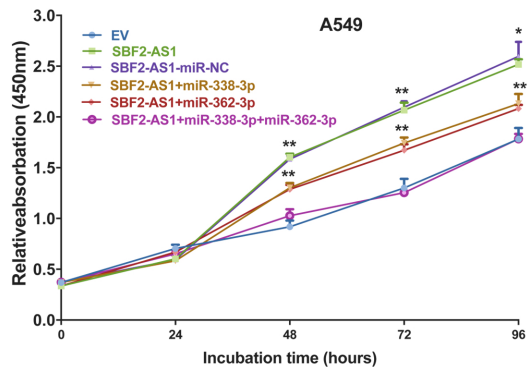**B**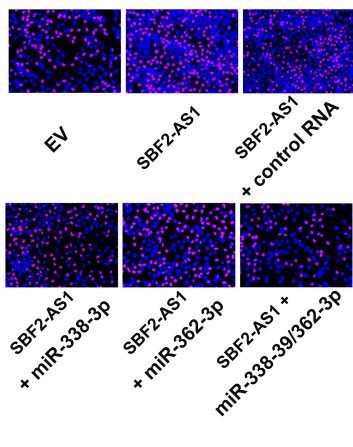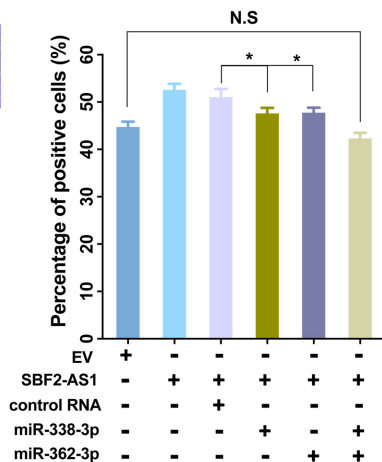**D**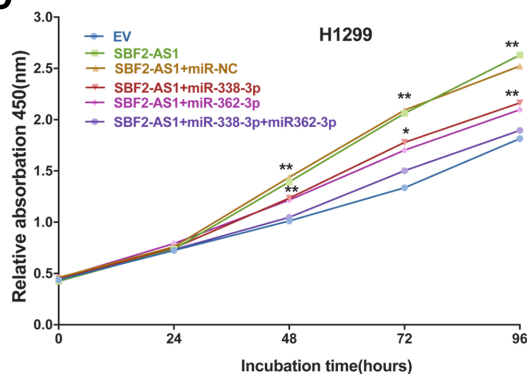

**Figure S4.** Venn plot of candidate target genes (A). ceRNA network driven by SBF2-AS1 (B).

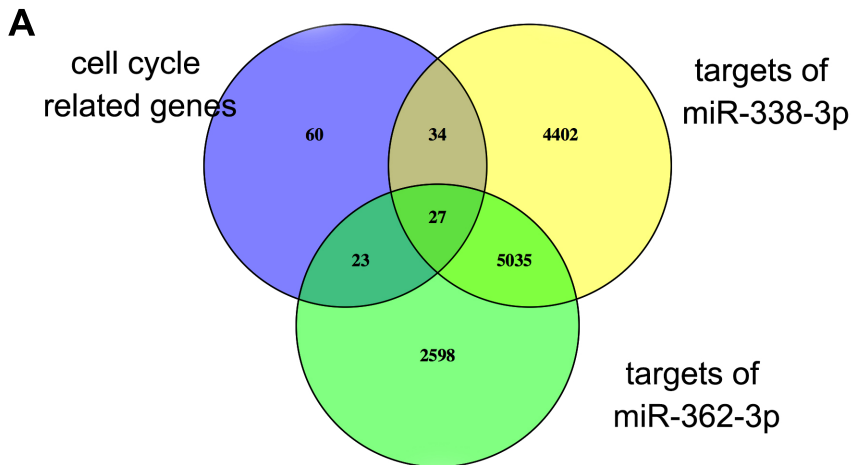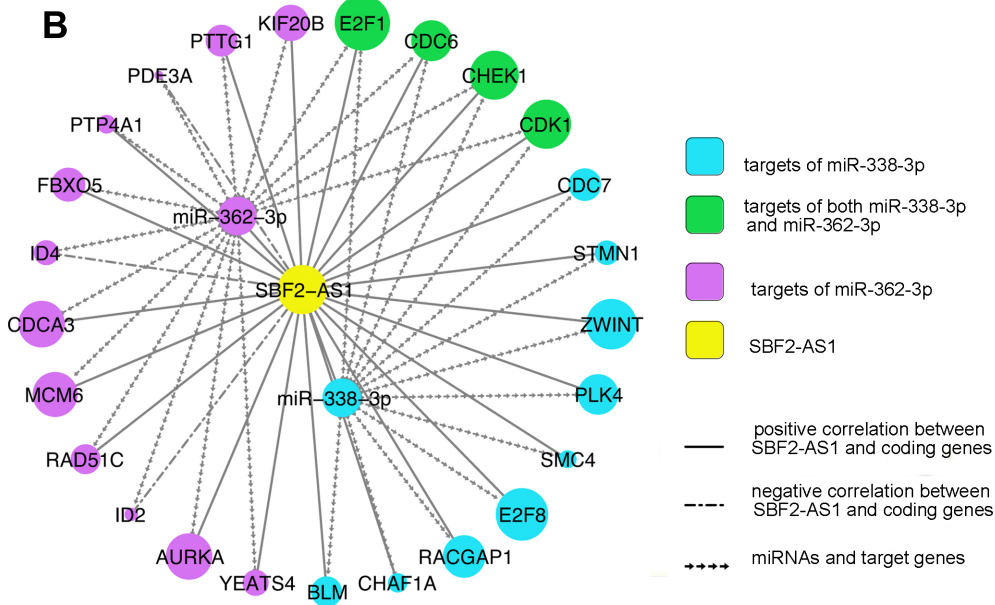

Supplement: mmc1.pdf [file mmc1.pdf]
